# Supplementary material
Source: HighWire-hosted journal article supplement (http://molpharm.aspetjournals.org/highwire/filestream/77116/field_highwire_adjunct_files/0/MOL__81927_supplemental_data.pdf)
Supplement: MOL__81927_supplemental_data.pdf [file MOL__81927_supplemental_data.pdf]

## Murine Oatp1a/1b uptake transporters control rosuvastatin systemic exposure without affecting its apparent liver exposure

Dilek Iusuf, Anita van Esch, Michael Hobbs, Maxine Taylor, Kathryn E. Kenworthy, Evita van de Steeg, Els Wagenaar and Alfred H. Schinkel

### Molecular Pharmacology

## Supplemental Figure 1

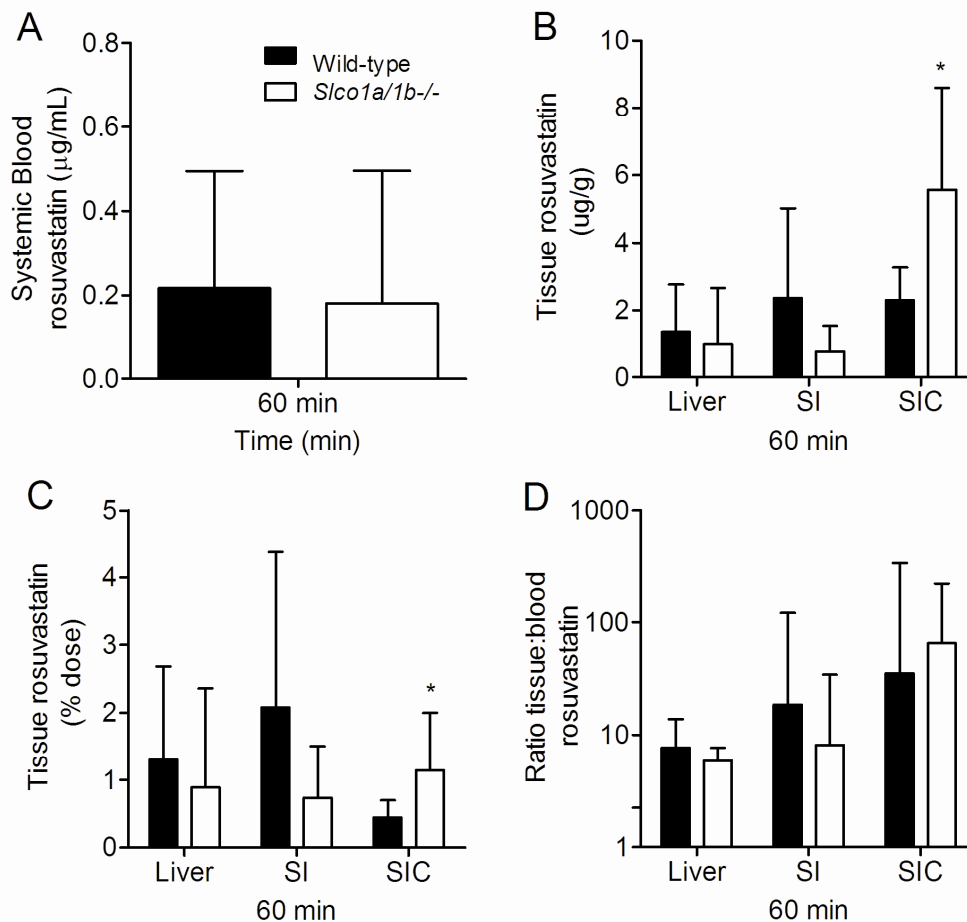

**Supplemental Figure 1.** Role of Oatp1a/1b in the disposition of rosuvastatin in gall bladder-cannulated mice after intravenous administration (5 mg/kg) to wild-type and *Slco1a/1b*<sup>-/-</sup> mice. (A) Rosuvastatin blood concentrations (µg/mL). Liver, small intestinal wall (SI) and content (SIC) in (B) (µg/g) and (C) % of dose. (D) Liver, small intestinal wall, and small intestinal content to blood ratios. Data are presented as mean ± SD (n = 6-7, \*,  $P < 0.05$ ; \*\*,  $P < 0.01$ ; \*\*\*,  $P < 0.001$  when compared with wild-type).

## Supplemental Figure 2

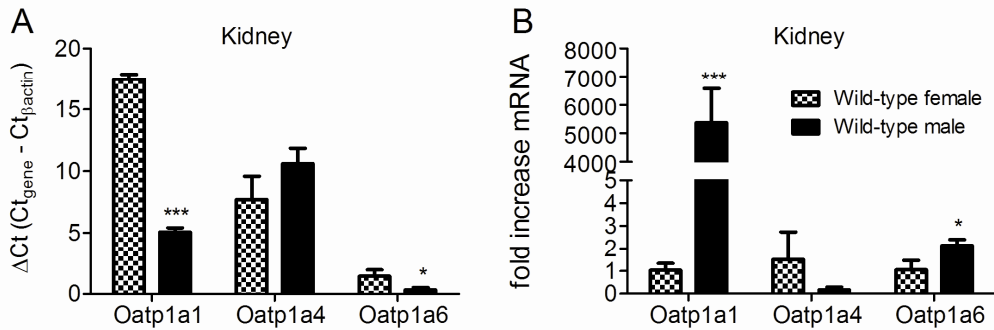

Supplemental Figure 2. Kidney Oatp1a expression in male and female wild-type mice. (A)  $\Delta Ct$  values of the RT-PCR analysis. Analysis of the results was done by the comparative Ct method. Quantification of the target cDNAs in all samples was normalized against the endogenous control Gapdh ( $Ct_{\text{target}} - Ct_{\text{Gapdh}} = \Delta Ct$ ). Accordingly, the lower the  $\Delta Ct$  value, the higher the expression level. Note that  $\Delta Ct$  values between different genes/primer sets cannot be used to assess relative expression levels between different genes. (B) Fold difference in mRNA expression levels in male wild-type mice relative to values in female wild-type. Data are presented as mean  $\pm$  S.D (n =3) (\*,  $P < 0.05$ ; \*\*\*,  $P < 0.001$  when compared with female wild-type values).
